# Supplementary material
Source: publisher site journal article supplement (https://static.cambridge.org/content/id/urn:cambridge.org:id:article:S1047198700012705/resource/name/supplementarydata2.rtf)
Supplement: Supplementary file 1 [file supplementarydata2.rtf]

\documentclass[letterpaper,12pt]{article}

\usepackage{pa}
\usepackage[letterpaper,centering,vscale=0.76]{geometry}

\begin{document}

\begin{center}

{\large On the Fixed-Effects Vector Decomposition} \\
\bigskip \bigskip
Trevor Breusch\\
Michael B. Ward\\
Hoa Nguyen\\
Tom Kompas\\
\bigskip \bigskip

Crawford School of Economics and Government\\
The Australian National University\\
Canberra, ACT 0200, Australia \\\medskip
email: Trevor.Breusch@anu.edu.au (corresponding author)

\end{center}


\thispagestyle{empty}
\end{document}
